# Supplementary material for: Which global reanalysis dataset represents better in snow cover on the Tibetan Plateau?
Source: Copernicus journal article supplement (doi:10.5194/egusphere-2024-82), 2024-02-23
Supplement: Supplementary file 1 [file egusphere-2024-82-supplement.pdf]

# Which global reanalysis dataset represents better in snow cover on the Tibetan Plateau?

Shirui Yan<sup>1</sup>, Wei Pu<sup>1,\*</sup>, Yang Chen<sup>1</sup>, Yaliang Hou<sup>1</sup>, Xuejing Li<sup>1</sup>, Yuxuan Xing<sup>1</sup>,  
5 Dongyou Wu<sup>1</sup>, Jiecan Cui<sup>2</sup>, Yue Zhou<sup>1</sup>, Xin Wang<sup>1,\*</sup>

<sup>1</sup> Key Laboratory for Semi-Arid Climate Change of the Ministry of Education, College of Atmospheric Sciences, Lanzhou University, Lanzhou 730000, China.

<sup>2</sup> Zhejiang Development & Planning Institute, Hangzhou 310030, China

10

*Correspondence to:* Wei Pu, ([puwei@lzu.edu.cn](mailto:puwei@lzu.edu.cn)); Xin Wang, ([wxin@lzu.edu.cn](mailto:wxin@lzu.edu.cn))

Table S1. Characteristics of the GLDAS-2.1 snow cover products used in this study.

|               | Spatial resolution | Land Surface Model |
|---------------|--------------------|--------------------|
| GLDAS_NOAH025 | 0.25°×0.25°        | NOAH               |
| GLDAS_NOAH100 | 1°×1°              | NOAH               |
| GLDAS_VIC_100 | 1°×1°              | VIC                |
| GLDAS_CLSM100 | 1°×1°              | CLSM               |

15

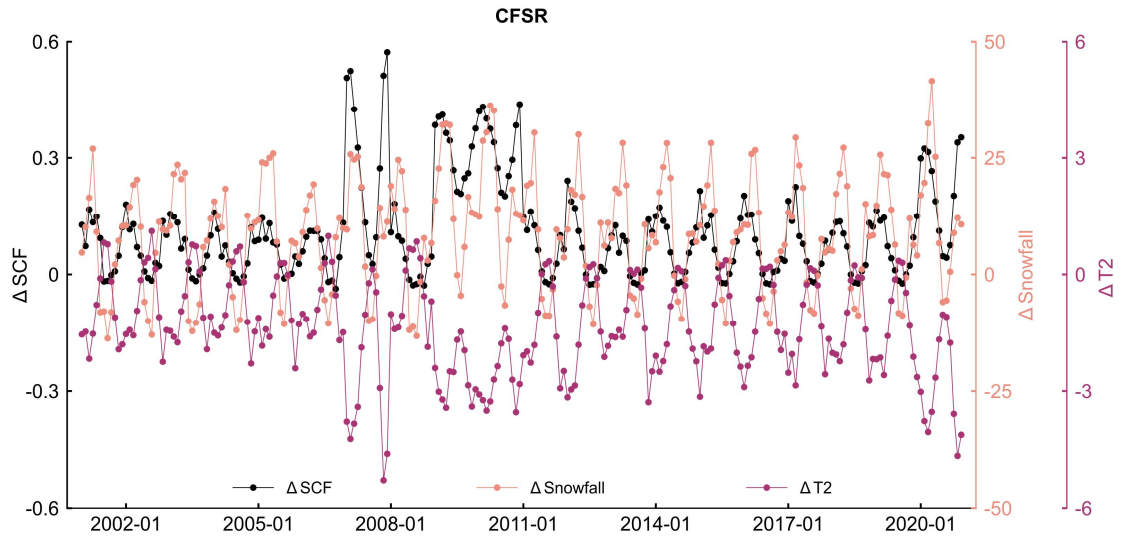

**Figure S1: Temporal variations of the monthly SCF (black), snowfall (light pink), and T2 (purple) bias in the CFSR, based on SPIReS, over the Tibetan Plateau region from January 2001 to December 2020.**

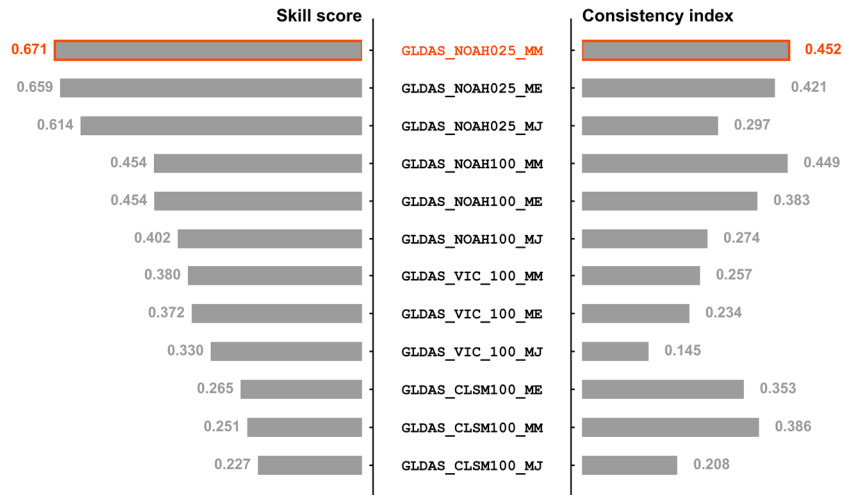

20

**Figure S2: SS and CI values of SCF calculated offline using the MM\_SCF, MJ\_SCF, and ME\_SCF parameterization methods and various products from GLDAS-2.1.**

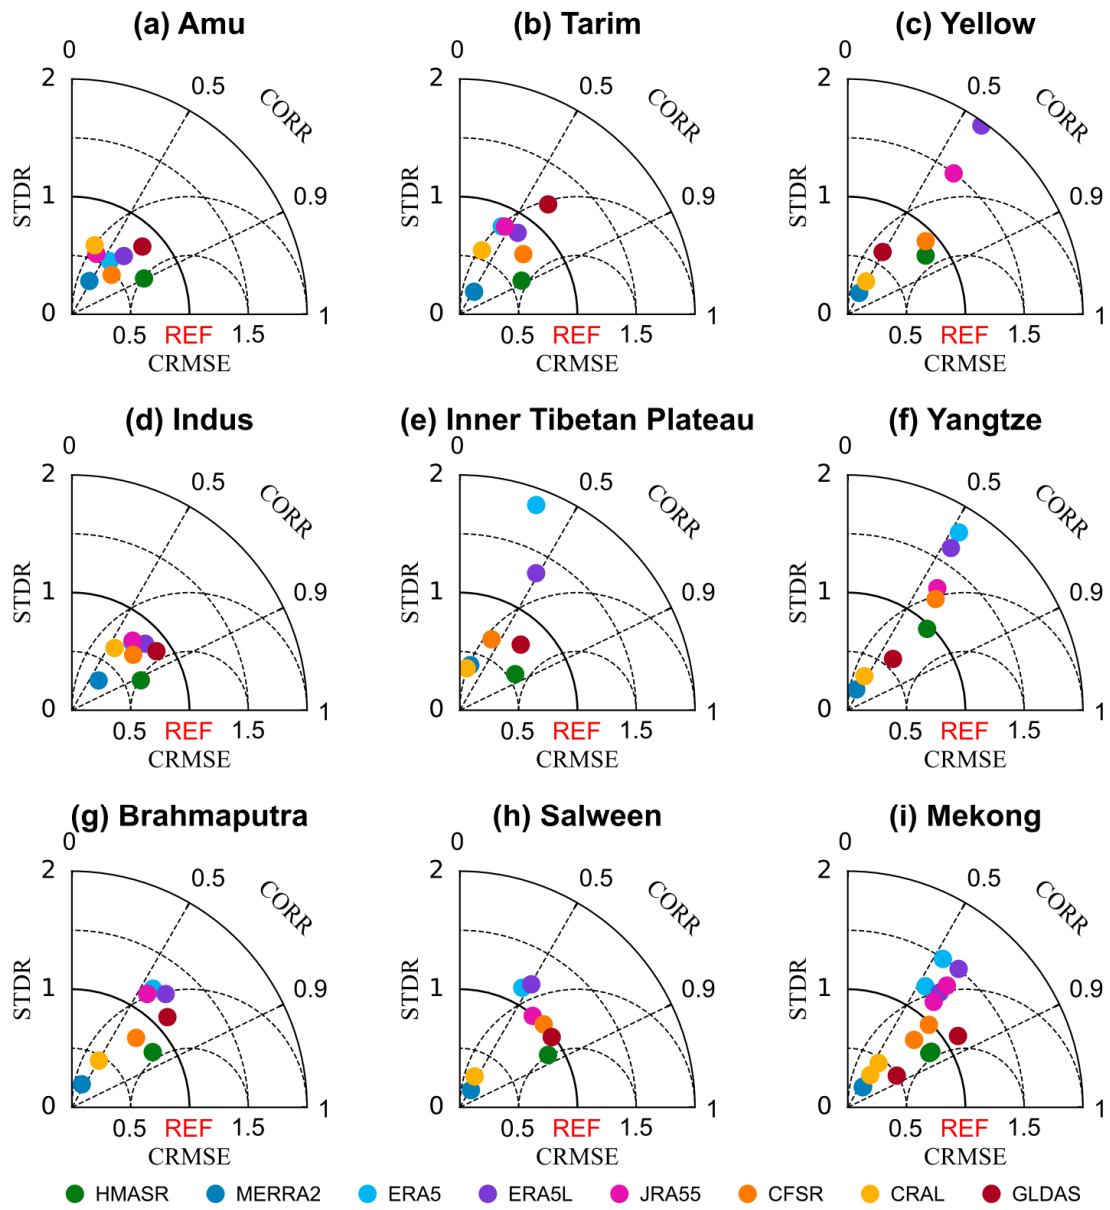

Figure S3: Taylor diagrams showing the spatial correlation coefficients ( $R$ ) and standard deviation ratio (STDR) of SCF between reanalysis datasets and SPIReS for each basin.

25

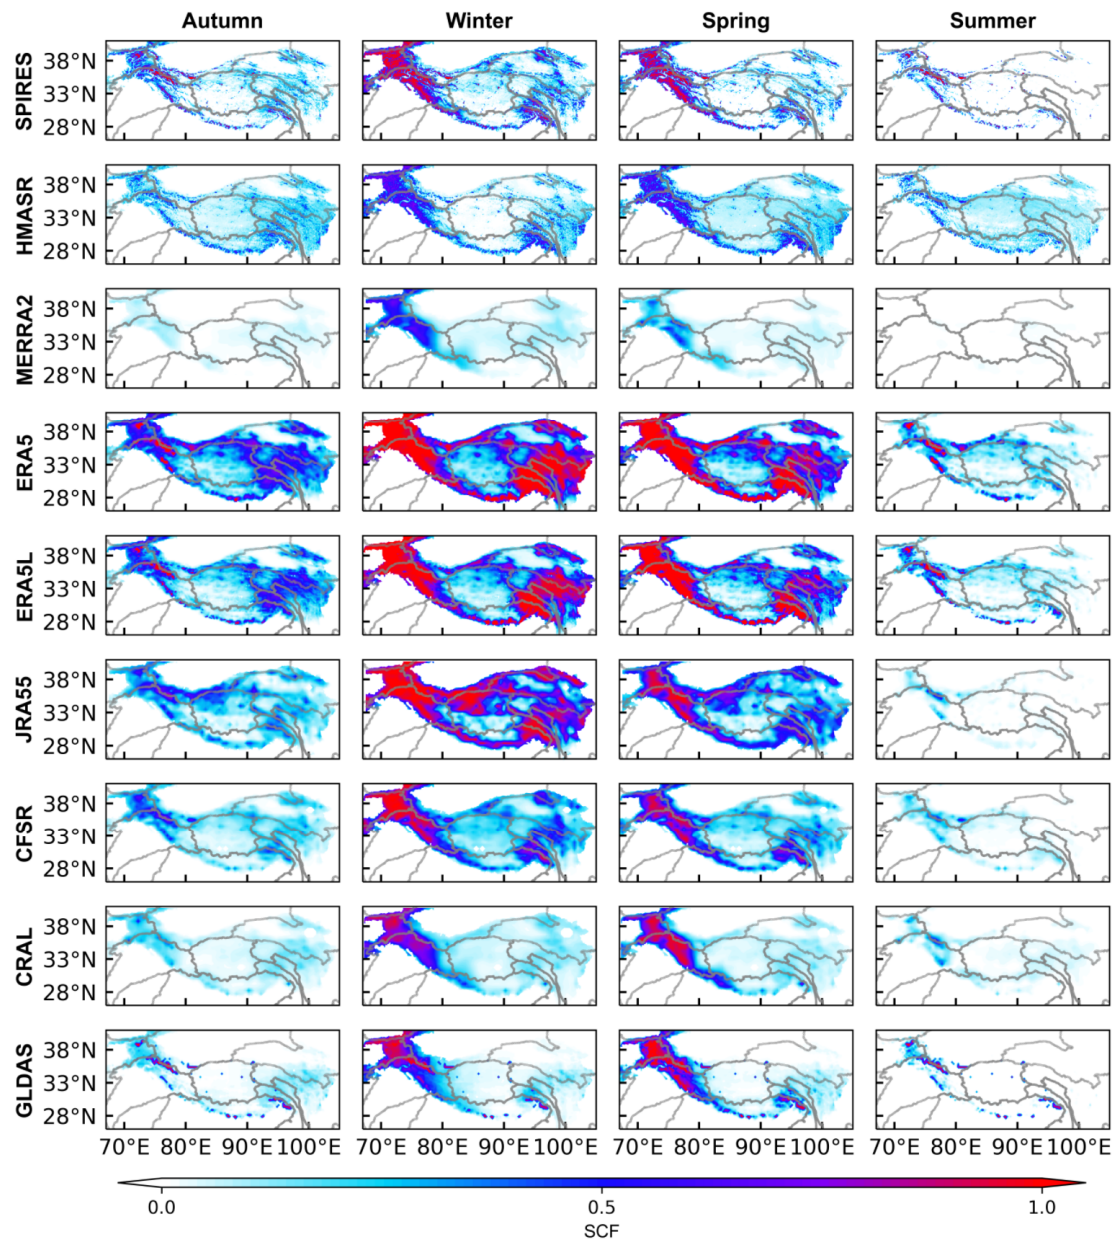

**Figure S4: Spatial distribution of the averaged seasonal SCF from each dataset for 2001–2020 over the Tibetan Plateau region.**

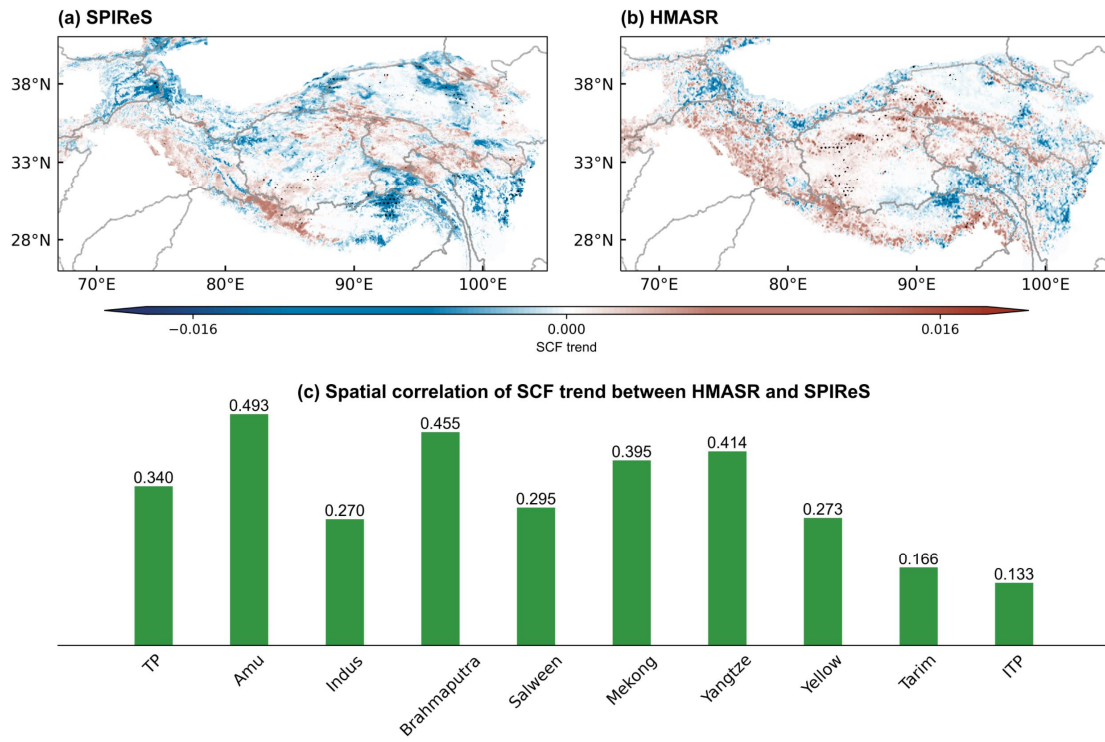

30

**Figure S5: (a), (b) Spatial distribution of the annual trend in SCF for SPIReS and HMASR over the Tibetan Plateau region from 2001 to 2016. (c) Spatial correlations of SCF annual trends between HMASR and SPIReS for each basin. Black dots in (a) and (b) indicate that the trend exceeds the 95% confidence level.**
